# Supplementary material
Source: ML conference proceedings conference paper supplement (https://proceedings.neurips.cc/paper_files/paper/2012/hash/045117b0e0a11a242b9765e79cbf113f-Abstract.html)
Supplement: Supplementary file [file 045117b0e0a11a242b9765e79cbf113f-Supplemental.zip]

---

# Supplementary Material for “Selective Labeling via Error Bound Minimization”

---

**Quanquan Gu<sup>†</sup>, Tong Zhang<sup>‡</sup>, Chris Ding<sup>§</sup>, Jiawei Han<sup>†</sup>**

<sup>†</sup>Department of Computer Science, University of Illinois at Urbana-Champaign

<sup>‡</sup>Department. of Statistics, Rutgers University

<sup>§</sup>Department. of Computer Science & Engineering, University of Texas at Arlington  
qgu3@illinois.edu, tzhang@stat.rutgers.edu, chqding@uta.edu, hanj@cs.uiuc.edu

## 1 Derivation of Eq. (19)

Recall that the Lagrangian function is

$$L(\mathbf{S}) = \text{tr}(\mathbf{X}^T (\mathbf{XSS}^T \mathbf{LSS}^T \mathbf{X}^T + \lambda \mathbf{I})^{-1} \mathbf{X}) \quad (1)$$

where we ignore the term  $\text{tr}(\mathbf{A}(\mathbf{S}^T \mathbf{S} - \mathbf{I}))$ , whose derivative is trivial.

To compute its derivative with respect to  $\mathbf{S}$ , we use the definition of derivative.

Let

$$\mathbf{D} = \frac{\partial L}{\partial \mathbf{S}} \quad (2)$$

Let  $\Delta$  be a small perturbation on  $\mathbf{S}$ . We have

$$\begin{aligned} & \text{tr}(\mathbf{D}\Delta^T) \\ &= L(\mathbf{S} + \Delta) - L(\mathbf{S}) \\ &= \text{tr}(\mathbf{X}^T (\mathbf{X}(\mathbf{S} + \Delta)(\mathbf{S} + \Delta)^T \mathbf{L}(\mathbf{S} + \Delta)(\mathbf{S} + \Delta)^T \mathbf{X}^T + \lambda \mathbf{I})^{-1} \mathbf{X}) \\ &\quad - \text{tr}(\mathbf{X}^T (\mathbf{XSS}^T \mathbf{X}^T + \mathbf{XSS}^T \mathbf{LSS}^T \mathbf{X}^T + \lambda \mathbf{I})^{-1} \mathbf{X}) \\ &\approx \text{tr}(\mathbf{X}^T (\mathbf{XSS}^T \mathbf{LSS}^T \mathbf{X}^T + \lambda \mathbf{I} + \mathbf{X}(\Delta \mathbf{S}^T + \mathbf{S} \Delta^T) \mathbf{LSS}^T \mathbf{X}^T + \mathbf{X}^T \mathbf{SS}^T \mathbf{L}(\mathbf{S} \Delta^T + \Delta \mathbf{S}^T) \mathbf{X}^T)^{-1} \mathbf{X}) \\ &\quad - \text{tr}(\mathbf{X}^T (\mathbf{XSS}^T \mathbf{LSS}^T \mathbf{X}^T + \lambda \mathbf{I})^{-1} \mathbf{X}) \end{aligned} \quad (3)$$

where we omit the second-order term of  $\Delta$  because it does not affect the calculation of first-order derivative.

Let

$$\mathbf{A} = \mathbf{XSS}^T \mathbf{LSS}^T \mathbf{X}^T + \lambda \mathbf{I} \quad (4)$$

Eq. (3) can be further simplified as

$$\begin{aligned} & \text{tr}(\mathbf{D}\Delta^T) \\ &= \text{tr}(\mathbf{X}^T (\mathbf{A} + \mathbf{X}(\Delta \mathbf{S}^T + \mathbf{S} \Delta^T) \mathbf{LSS}^T \mathbf{X}^T + \mathbf{X}^T \mathbf{SS}^T \mathbf{L}(\mathbf{S} \Delta^T + \Delta \mathbf{S}^T) \mathbf{X}^T)^{-1} \mathbf{X}) \\ &\quad - \text{tr}(\mathbf{X}^T \mathbf{A}^{-1} \mathbf{X}) \\ &= \text{tr}(\mathbf{X}^T (\mathbf{A}(\mathbf{I} + \mathbf{A}^{-1} \mathbf{X}(\Delta \mathbf{S}^T + \mathbf{S} \Delta^T) \mathbf{LSS}^T \mathbf{X}^T + \mathbf{A}^{-1} \mathbf{X}^T \mathbf{SS}^T \mathbf{L}(\mathbf{S} \Delta^T + \Delta \mathbf{S}^T) \mathbf{X}^T))^{-1} \mathbf{X}) \\ &\quad - \text{tr}(\mathbf{X}^T \mathbf{A}^{-1} \mathbf{X}) \\ &= \text{tr}(\mathbf{X}^T (\mathbf{I} + \mathbf{A}^{-1} \mathbf{X}(\Delta \mathbf{S}^T + \mathbf{S} \Delta^T) \mathbf{LSS}^T \mathbf{X}^T + \mathbf{A}^{-1} \mathbf{X}^T \mathbf{SS}^T \mathbf{L}(\mathbf{S} \Delta^T + \Delta \mathbf{S}^T) \mathbf{X}^T)^{-1} \mathbf{A}^{-1} \mathbf{X}) \\ &\quad - \text{tr}(\mathbf{X}^T \mathbf{A}^{-1} \mathbf{X}) \end{aligned} \quad (5)$$

Since  $\mathbf{X}(\Delta\mathbf{S}^T + \mathbf{S}\Delta^T)\mathbf{LSS}^T\mathbf{X}^T$  and  $\mathbf{X}^T\mathbf{SS}^T\mathbf{L}(\mathbf{S}\Delta^T + \Delta\mathbf{S}^T)\mathbf{X}^T$  are small, using the first-order Taylor expansion  $(\mathbf{I} + \mathbf{C})^{-1} = \mathbf{I} - \mathbf{C}$ , we have

$$\begin{aligned}
& \text{tr}(\mathbf{D}\Delta^T) \\
&= \text{tr}(\mathbf{X}^T(\mathbf{I} - \mathbf{A}^{-1}\mathbf{X}(\Delta\mathbf{S}^T + \mathbf{S}\Delta^T)\mathbf{LSS}^T\mathbf{X}^T - \mathbf{A}^{-1}\mathbf{X}^T\mathbf{SS}^T\mathbf{L}(\mathbf{S}\Delta^T + \Delta\mathbf{S}^T)\mathbf{X}^T)\mathbf{A}^{-1}\mathbf{X}) \\
&- \text{tr}(\mathbf{X}^T\mathbf{A}^{-1}\mathbf{X}) \\
&= -\text{tr}(\mathbf{X}^T\mathbf{A}^{-1}(\mathbf{X}(\Delta\mathbf{S}^T + \mathbf{S}\Delta^T)\mathbf{LSS}^T\mathbf{X}^T + \mathbf{X}^T\mathbf{SS}^T\mathbf{L}(\mathbf{S}\Delta^T + \Delta\mathbf{S}^T)\mathbf{X}^T)\mathbf{A}^{-1}\mathbf{X}) \\
&= -\text{tr}(\mathbf{X}^T\mathbf{A}^{-1}(\mathbf{X}(\Delta\mathbf{S}^T + \mathbf{S}\Delta^T)\mathbf{LSS}^T\mathbf{X}^T + \mathbf{X}^T\mathbf{SS}^T\mathbf{L}(\mathbf{S}\Delta^T + \Delta\mathbf{S}^T)\mathbf{X}^T)\mathbf{A}^{-1}\mathbf{X}) \quad (6)
\end{aligned}$$

Therefore

$$\begin{aligned}
\frac{\partial L}{\partial \mathbf{S}} &= \mathbf{D} \\
&= -2(\mathbf{X}^T\mathbf{B}\mathbf{X}\mathbf{S}\mathbf{S}^T\mathbf{L}\mathbf{S} + \mathbf{LSS}^T\mathbf{X}^T\mathbf{B}\mathbf{X}\mathbf{S}) \quad (7)
\end{aligned}$$

where  $\mathbf{B} = \mathbf{A}^{-1}\mathbf{X}\mathbf{X}^T\mathbf{A}^{-1}$

## 2 Additional Experiments

The experimental results using ridge regression (RR) are shown in Figure 1. In all subfigures, the x-axis represents the number of labeled points, while the y-axis is the averaged classification accuracy on the test data over 10 runs.

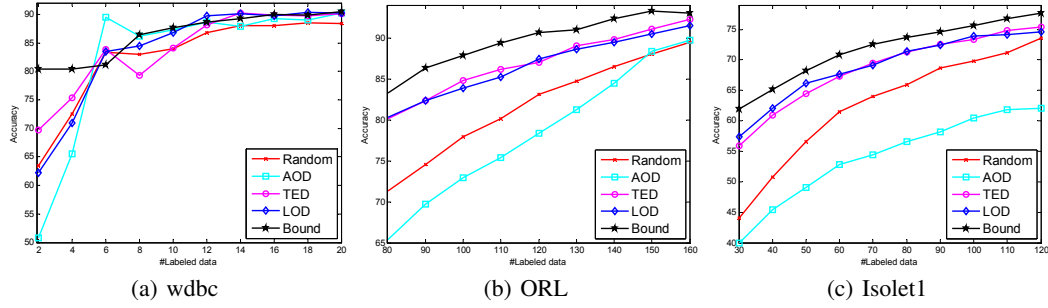

Figure 1: Comparison of different methods on (a) wdbc; (b) ORL; and (c) Isolet1 using ridge regression.

We can see that our proposed method is also much better than the other methods using RR.
